# Supplementary material for: Analysing calcium dependent and independent regulation of eNOS in endothelium triggered by extracellular signalling events
Source: Royal Society of Chemistry journal article supplement (doi:10.1039/c3mb70258h), 2013-07-24
Supplement: c3mb70258h.pdf [file c3mb70258h.pdf]

**Table S1.** List of initial concentration of pool values taken in simulation of comprehensive network of eNOS activation pathway.

| S.NO | Molecular Species | Concentration ( $\mu\text{M}$ ) |
|------|-------------------|---------------------------------|
| 1    | G protein         | 1 <sup>[1]</sup>                |
| 2    | Adenylyl Cyclase  | 0.015 <sup>[1]</sup>            |
| 3    | PKA               | 0.5 <sup>[1]</sup>              |
| 4    | ATP               | 5000 <sup>[1]</sup>             |
| 5    | eNOS              | 1 <sup>[2]</sup>                |
| 6    | PI3-kinase        | 0.1 <sup>[3]</sup>              |
| 7    | PIP2              | 7 <sup>[3]</sup>                |
| 8    | PTEN              | 0.27 <sup>[3]</sup>             |
| 9    | Akt               | 0.2 <sup>[4]</sup>              |
| 10   | PDK               | 1 <sup>[4]</sup>                |
| 11   | PIP3-PDK2         | 0.003 <sup>[4]</sup>            |
| 12   | PP2A              | 0.15 <sup>[4]</sup>             |
| 13   | VEGF              | 2e-06 <sup>[5]</sup>            |
| 14   | VEGFR2            | 0.0024 <sup>[6]</sup>           |
| 15   | PLC $\gamma$      | 0.82 <sup>[7]</sup>             |
| 16   | PLC $\beta$       | 0.8 <sup>[7]</sup>              |
| 17   | PKC               | 1 <sup>[7]</sup>                |
| 18   | Calcium           | 0.08 <sup>[8]</sup>             |
| 19   | Ca_Sequester      | 6.3 <sup>[1]</sup>              |
| 20   | IP3R              | 0.0166 <sup>[1]</sup>           |
| 21   | Calmodulin        | 20 <sup>[7]</sup>               |
| 22   | L-Arginine        | 100 <sup>[9]</sup>              |

**Table S2. List of kinetic parameters and biochemical reactions considered in shear and VEGF induced eNOS activation.**

| S.NO | Specification         | Binding Reaction                                                                        | $k_f$ ( $\mu\text{M}^{-1} \text{s}^{-1}$ ) | $k_b$ ( $\text{s}^{-1}$ ) |
|------|-----------------------|-----------------------------------------------------------------------------------------|--------------------------------------------|---------------------------|
| 1    | Activate_Gs           | $\text{GDP-}\alpha\beta\gamma \rightarrow \text{GTP.Gs-}\alpha + \text{Gs-}\beta\gamma$ | $0.004^*$                                  | 0                         |
| 2    | Trimerise_Gs          | $\text{GTP.Gs-}\alpha \rightarrow \text{GDP.Gs-}\alpha$                                 | $1.25\text{e-}06^{[1]}$                    | $0^{[1]}$                 |
| 3    | GTPase                | $\text{GDP.Gs-}\alpha \rightarrow \text{GDP-}\alpha\beta\gamma$                         | $0.25^{[1]}$                               | $0^{[1]}$                 |
| 4    | GTP.Gs-bind-AC        | $\text{GTP.Gs-}\alpha + \text{AC} \leftrightarrow \text{GTP.Gs-}\alpha - \text{AC}$     | $4.8\text{e-}07^*$                         | $1^*$                     |
| 5    | PKA-activation        | $\text{cAMP} + \text{Inactive-PKA} \leftrightarrow \text{PKA-Active}$                   | $7.5\text{e-}08^*$                         | $10^*$                    |
| 6    | eNOS1-phosphorylation | $\text{PKA-Active} \leftrightarrow \text{eNOS-Po4}$                                     | $4.24\text{e-}07^*$                        | $8^*$                     |
| 7    | PI3K-bind-Gs-by       | $\text{Gs-}\beta\gamma + \text{PI3K} \leftrightarrow \text{Gs-}\beta\gamma\text{-PI3K}$ | $9.9\text{e-}08^*$                         | $2.5^*$                   |
| 8    | Activated-PI3K        | $\text{Gs-}\beta\gamma\text{-PI3K} \leftrightarrow \text{PI3K-Active}$                  | $0.039^*$                                  | $0.01^*$                  |
| 9    | PDK1Translocation     | $\text{PIP3} + \text{PDK1} \leftrightarrow \text{PIP3-PDK1}$                            | $7.8\text{e-}08^{[4]}$                     | $1^{[4]}$                 |
| 10   | PIP3bindAKT           | $\text{PIP3} + \text{Akt} \leftrightarrow \text{PIP3-Akt}$                              | $7.8\text{e-}08^{[4]}$                     | $0.19^{[4]}$              |
| 11   | VEGF binding VEGFR2   | $\text{VEGF} + \text{VEGFR-2} \leftrightarrow \text{VEGF-VEGFR2}$                       | $4.98\text{e-}05^{[10,11]}$                | $0.51^{[10,11]}$          |
| 12   | Dimerization          | $\text{VEGF-VEGFR2} \leftrightarrow \text{VEGFR2-dimer}$                                | $0.166^{[12,13]}$                          | $0.036^{[12,13]}$         |

|           |                                 |                                                                           |                          |                       |
|-----------|---------------------------------|---------------------------------------------------------------------------|--------------------------|-----------------------|
| <b>13</b> | Autophosphorylation             | VEGFR2-dimer $\leftrightarrow$ VEGFR-PO4                                  | 0.38 <sup>[14]</sup>     | 0.23 <sup>[14]</sup>  |
| <b>14</b> | Internalization                 | VEGFR-PO4 $\rightarrow$ Internalized                                      | 2.8e-15 <sup>[15]</sup>  | 0                     |
| <b>15</b> | PI3K-Binding-VEGFR-PO4          | VEGFR-PO4+PI3K_inactive $\leftrightarrow$ PI3K- VEGFR-PO4                 | 9.6e-08 <sup>*</sup>     | 0.089 <sup>*</sup>    |
| <b>16</b> | Activates_PI3K                  | PI3K- VEGFR-PO4 $\leftrightarrow$ PI3K-Active                             | 0.014 <sup>*</sup>       | 0.004 <sup>*</sup>    |
| <b>17</b> | PLC $\gamma$ _Activation        | Inactive_ PLC $\gamma$ + VEGFR-PO4 $\leftrightarrow$ PLC $\gamma$ _Active | 9.79e-08 <sup>*</sup>    | 1.55 <sup>*</sup>     |
| <b>18</b> | IP3-binding-IP3R                | IP3+IP3+IP3+IP3R $\leftrightarrow$ IP3-IP3R_chan                          | 3.08e-23 <sup>[1]</sup>  | 0.87 <sup>[1]</sup>   |
| <b>19</b> | PKC-act-Ca                      | Ca_cytosol+PKC $\leftrightarrow$ PKC_Ca                                   | 6.039e-10 <sup>[1]</sup> | 5 <sup>[1]</sup>      |
| <b>20</b> | PKC-act-DAG                     | PKC_Ca+DAG $\leftrightarrow$ PKC_Ca_DAG                                   | 3.57e-07 <sup>[1]</sup>  | 7.67 <sup>[1]</sup>   |
| <b>21</b> | PKC_Active                      | PKC_Ca_DAG $\leftrightarrow$ PKC_Active                                   | 2.4 <sup>[1]</sup>       | 0.0034 <sup>[1]</sup> |
| <b>22</b> | PKC-bind-eNOS                   | PKC_Active +eNOS-Thr497 $\leftrightarrow$ eNOS-Thr497-Po4                 | 6.82e-08 <sup>*</sup>    | 0.49 <sup>*</sup>     |
| <b>23</b> | DAG-Degradation                 | DAG $\rightarrow$ dag_degraded                                            | 0.015 <sup>[7*]</sup>    | 0                     |
| <b>24</b> | IP3-degradation                 | IP3 $\rightarrow$ IP3_degraded                                            | 0.0318 <sup>[7*]</sup>   | 0                     |
| <b>25</b> | Ca-bind-CaM                     | Ca_cytosol+CaM $\leftrightarrow$ Ca-CaM                                   | 6.43e-10 <sup>[1*]</sup> | 8.2 <sup>[1*]</sup>   |
| <b>26</b> | Ca-CaM-bind-eNOS                | Ca-CaM+eNOS-ca-CaM $\leftrightarrow$ eNOS Ca-Cam Active                   | 4.58e-07 <sup>[16]</sup> | 0.18 <sup>[16]</sup>  |
| <b>27</b> | Ca-bind- Inactive_ PLC $\gamma$ | Ca_cytosol+ Inactive_ PLC $\gamma$ $\leftrightarrow$ PLC $\gamma$ _Ca     | 7.24e-08 <sup>[7]</sup>  | 15 <sup>[7]</sup>     |
| <b>28</b> | Ca-bind- Active_                | Ca_cytosol+ Active_                                                       | 1.08e-08 <sup>[7]</sup>  | 15 <sup>[7]</sup>     |

|           |                                           |                                                                                    |                            |                           |
|-----------|-------------------------------------------|------------------------------------------------------------------------------------|----------------------------|---------------------------|
|           | PLC $\gamma$                              | PLC $\gamma \leftrightarrow$ PLC $\gamma$ _Ca_Active                               |                            |                           |
| <b>29</b> | PLC $\gamma$ _Ca_Active-dephosphorylation | PLC $\gamma$ _Ca_Active $\rightarrow$<br>PLC $\gamma$ _Ca                          | 5e-06 <sup>[7]</sup>       | 0                         |
| <b>30</b> | Activate_Gq                               | GDP- $\alpha\beta\gamma \rightarrow$ Gq- $\alpha$ + Gq- $\beta\gamma$              | 0.0005 <sup>*</sup>        | 0                         |
| <b>31</b> | Trimerise_Gq                              | Gq- $\alpha \rightarrow$ GDP.Gq- $\alpha$                                          | 3.62e-07 <sup>*</sup>      | 0                         |
| <b>32</b> | GTPase_q                                  | GDP.Gq- $\alpha \rightarrow$ GDP- $\alpha\beta\gamma$                              | 0.24 <sup>*</sup>          | 0                         |
| <b>33</b> | Gq- $\alpha$ binds PLC_ $\beta$           | Gq- $\alpha$ + PLC_ $\beta$ _Inactive $\leftrightarrow$<br>PLC_ $\beta$ -Active    | 9.79e-08 <sup>[17*]</sup>  | 1.55 <sup>[17*]</sup>     |
| <b>34</b> | eNOS binds L-Arg                          | eNOS <sup>conserved</sup> + L-arg $\leftrightarrow$<br>Nitric Oxide + L-citrulline | 3.84e-07 <sup>[18]</sup>   | 9.8e-06 <sup>[18]</sup>   |
| <b>35</b> | Ca_release                                | IP3IP3R_chan+Ca_sequester<br>$\leftrightarrow$ Ca_cytosol                          | gmax<br>0.1 <sup>[1]</sup> | Perm<br>19 <sup>[1]</sup> |

**Table S3. List of enzyme kinetic parameters involved in the eNOS signalling cascade**

| S.No | Specification                        | Enzymatic Reaction                                                                                                                                             | $K_m$ ( $\mu\text{M}$ ) | $k_{\text{cat}}$ ( $\text{s}^{-1}$ ) |
|------|--------------------------------------|----------------------------------------------------------------------------------------------------------------------------------------------------------------|-------------------------|--------------------------------------|
| 1    | GTP.Gs-a-bind-AC-Cyclase             | $\text{GTP.Gs-}\alpha - \text{AC} + \text{ATP} \leftrightarrow$<br>$\text{GTP.Gs-}\alpha - \text{AC} - \text{ATP} \rightarrow \text{cAMP}$                     | 20*                     | 18*                                  |
| 2    | Activated PI3k kinases               | $\text{Active-PI3Kinase} + \text{PIP2} \leftrightarrow \text{PI3K-}$<br>$\text{PIP2} \rightarrow \text{PIP3}$                                                  | 38 <sup>[1]</sup>       | 10 <sup>[1]</sup>                    |
| 3    | PTEN Phosphatase                     | $\text{PIP3} + \text{PTEN} \leftrightarrow \text{PIP3-PTEN} \rightarrow \text{PIP2}$                                                                           | 0.8 <sup>[1]</sup>      | 6.2 <sup>[1]</sup>                   |
| 4    | PIP3-PDK1 phospho-T308               | $\text{PIP3-AKT} + \text{PIP3-}$<br>$\text{PDK1} \leftrightarrow \text{PIP3AKT-}$<br>$\text{PIP3PDK1} \rightarrow \text{PIP3-Akt-T308}$                        | 0.023 <sup>[4]</sup>    | 5.8 <sup>[4]</sup>                   |
| 5    | PIP3-PDK2 phospho-S473               | $\text{PIP3-Akt-T308} + \text{PIP3-}$<br>$\text{PDK2} \leftrightarrow \text{PIP3AktT308-}$<br>$\text{PIP3PDK2} \rightarrow \text{PIP3-Akt-S473}$               | 0.99 <sup>[4]</sup>     | 9.7 <sup>[4]</sup>                   |
| 6    | PP2A Dephospho-T308                  | $\text{PIP3-Akt-}$<br>$\text{S473} + \text{PP2A} \leftrightarrow \text{PIP3AktS473-}$<br>$\text{PP2A} \rightarrow \text{PIP3-Akt-T308}$                        | 0.26 <sup>[4]</sup>     | 1.2 <sup>[4]</sup>                   |
| 7    | PP2A Dephospho-S473                  | $\text{PIP3-Akt-T308} + \text{PP2A} \leftrightarrow$<br>$\text{PIP3AktT308-PP2A} \rightarrow \text{PIP3-AKT}$                                                  | 220 <sup>[4]</sup>      | 19.2 <sup>[4]</sup>                  |
| 8    | PIP3-AKT-T308-S473-eNOS-phospho      | $\text{PIP3-Akt-S473} + \text{eNOS1} \leftrightarrow \text{PIP3-}$<br>$\text{Akt-S473-eNOS1} \rightarrow \text{eNOS2-po4}$                                     | 0.1*                    | 0.1*                                 |
| 9    | PLC $\gamma$ _hydrolysis             | $\text{PLC}\gamma_{\text{Active}} + \text{PIP2} \leftrightarrow \text{PLC}\gamma_{\text{-}}$<br>$\text{PIP2} \rightarrow \text{DAG} + \text{IP3}$              | 9.9 <sup>[7*]</sup>     | 10 <sup>[7*]</sup>                   |
| 10   | Inactive_PLC $\gamma$ _Ca_hydrolysis | $\text{PLC}\gamma_{\text{Ca}} + \text{PIP2} \leftrightarrow \text{PLC}\gamma_{\text{-Ca-}}$<br>$\text{PIP2} \rightarrow \text{DAG} + \text{IP3}$               | 97 <sup>[7*]</sup>      | 14 <sup>[7*]</sup>                   |
| 11   | Active_PLC $\gamma$ _Ca_hydrolysis   | $\text{PLC}\gamma_{\text{Ca Active}} + \text{PIP2} \leftrightarrow \text{PLC}\gamma_{\text{-}}$<br>$\text{Ca-Active_PIP2} \rightarrow \text{DAG} + \text{IP3}$ | 19 <sup>[7*]</sup>      | 57 <sup>[7*]</sup>                   |

|    |                  |                                               |                     |                    |
|----|------------------|-----------------------------------------------|---------------------|--------------------|
| 12 | PLC_β-hydrolysis | PLC_β-Active+PIP2 ↔ PLC_β -<br>PIP2 → DAG+IP3 | 98 <sup>[16*]</sup> | 5 <sup>[16*]</sup> |
|----|------------------|-----------------------------------------------|---------------------|--------------------|

Kinetic parameters taken from indicated references are optimized and adapted to the present simulation conditions, hence may slightly vary from the literature value. Parameters indicated in [\*] are results of fitting under the model as described in Materials and Methods.

**Figure. S1.** Dose dependent effect of VEGF on tyrosine receptor phosphorylation

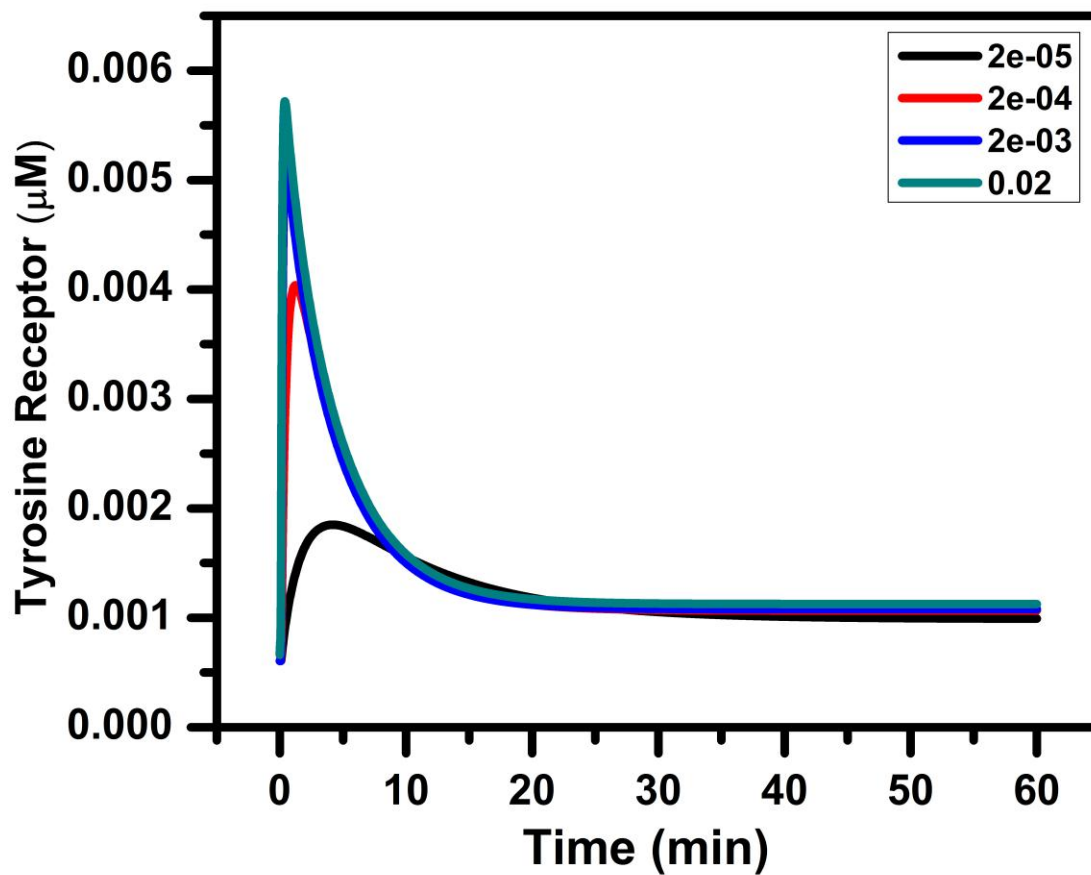

## References

1. S. Sivakumaran, S. Hariharaputran, J. Mishra and U. S. Bhalla, The Database of Quantitative Cellular Signaling: management and analysis of chemical kinetic models of signaling networks, *Bioinformatics.*, 2003, **19**, 408-15.
2. B. Roy and J. Garthwaite, Nitric oxide activation of guanylyl cyclase in cells revisited, *Proc Natl Acad Sci USA.*, 2006, **103**, 12185-90.
3. G. Koh, H. F. C. Teong, M. V. Clément, D. Hsu and P. S. Thiagarajan, A decompositional approach to parameter estimation in pathway modeling: a case study of the Akt and MAPK pathways and their crosstalk, *Bioinformatics.*, 2006, **22**, 271-280.
4. P. Jain and U. S. Bhalla, Signaling logic of activity-triggered dendritic protein synthesis: an mTOR gate but not a feedback switch, *PLoS Comput Biol.*, 2009, **5**, e1000287.
5. N. Ferrara and T. Davis-Smyth, The Biology of Vascular Endothelial Growth Factor, *Endocrine Reviews.*, 1997, **18**, 4-25.
6. F. Mac Gabhann and A.S. Popel, Dimerization of VEGF receptors and implications for signal transduction: a computational study, *Biophys Chem.*, 2007, **128**, 125-39.
7. X.N. Wei, B.C. Han, J.X. Zhang, X.H. Liu, C.Y. Tan, Y.Y. Jiang, B.C. Low, B. Tidor and Y.Z. Chen, An integrated mathematical model of thrombin-, histamine- and VEGF-mediated signalling in endothelial permeability, *BMC Syst Biol.*, 2011, **5**, 112.

8. N.S. Dawson, D.C. Zawieja, M.H. Wu and H.J. Granger, Signaling pathways mediating VEGF165-induced calcium transients and membrane depolarization in human endothelial cells, *FASEB J.*, 2006, **20**, 991-3.
9. S. Shin, S. Mohan and H.L. Fung, Intracellular L-arginine concentration does not determine NO production in endothelial cells: implications on the "L-arginine paradox", *Biochem Biophys Res Commun.*, 2011, **414**, 660-3.
10. F. Mac Gabhann, M. T. Yang and A. S. Popel, Monte Carlo simulations of VEGF binding to cell surface receptors in vitro, *Biochim Biophys Acta.*, 2005, **1746**, 95-107.
11. F. Mac Gabhann and A. S. Popel, Interactions of VEGF isoforms with VEGFR-1, VEGFR-2, and neuropilin in vivo: a computational model of human skeletal muscle, *Am J Physiol Heart Circ Physiol.*, 2004, **286**, H153-64.
12. F. Mac Gabhann and A. S. Popel, Targeting neuropilin-1 to inhibit VEGF signaling in cancer: Comparison of therapeutic approaches, *PLoS Comput Biol.*, 2006, **12**, e180.
13. F.T. Wu, M.O. Stefanini, F. Mac Gabhann and A.S. Popel, A compartment model of VEGF distribution in humans in the presence of soluble VEGF receptor-1 acting as a ligand trap, *PLoS One.*, 2009, **4**, e5108.
14. F. Mac Gabhann and A.S. Popel, Differential binding of VEGF isoforms to VEGF receptor 2 in the presence of neuropilin-1: a computational model, *Am J Physiol Heart Circ Physiol.*, 2005, **288**, H2851-60.



15. F.T. Wu, M.O. Stefanini, F. Mac Gabhann and A.S. Popel, Modeling of growth factor-receptor systems from molecular-level protein interaction networks to whole-body compartment models, *Methods Enzymol.*, 2009, **467**, 461-97.
16. T.J. Lukas, A signal transduction pathway model prototype I: From agonist to cellular endpoint, *Biophys J.*, 2004, **87**, 1406-16.
17. E. Leclerc, C. Corti, H. Schmid, S. Vetter, P. James and E. Carafoli, Serine/threonine phosphorylation of calmodulin modulates its interaction with the binding domains of target enzymes, *Biochem J.*, 1999, **344**, 403-11.
18. K. Chen and A.S. Popel, Theoretical analysis of biochemical pathways of nitric oxide release from vascular endothelial cells, *Free Radic Biol Med.*, 2006, **41**, 668-80.
